# Supplementary material
Source: publisher figshare collection journal article supplement (https://acs.figshare.com/ndownloader/files/3895405)
Supplement: Supplementary file 1 [file 3895405]

##############################################################################
###      FullProf-generated CIF output file  (version: May 2011)           ###
###      Template of CIF submission form for structure report              ###
##############################################################################
 
# This file has been generated using FullProf.2k taking one example of 
# structure report provided by Acta Cryst. It is given as a 'template' with 
# filled structural items. Many other items are left unfilled and it is the  
# responsibility of the user to properly fill or suppress them. In principle 
# all question marks '?' should be replaced by the appropriate text or 
# numerical value depending on the kind of CIF item. 
# See the document: cif_core.dic (URL: http://www.iucr.org) for details. 
 
# Please notify any error or suggestion to: 
#           Juan Rodriguez-Carvajal (jrc@ill.eu)
# Improvements will be progressively added as needed.
 
#=============================================================================
 data_global
_refine_ls_goodness_of_fit_all   1.96

_publ_section_related_literature ?

#=============================================================================
 
# PROCESSING SUMMARY (IUCr Office Use Only)
 
_journal_data_validation_number      ?
 
_journal_date_recd_electronic        ?
_journal_date_to_coeditor            ?
_journal_date_from_coeditor          ?
_journal_date_accepted               ?
_journal_date_printers_first         ?
_journal_date_printers_final         ?
_journal_date_proofs_out             ?
_journal_date_proofs_in              ?
_journal_coeditor_name               ?
_journal_coeditor_code               ?
_journal_coeditor_notes
?
_journal_techeditor_code             ?
_journal_techeditor_notes
?
_journal_coden_ASTM                  ?
_journal_name_full                   ?
_journal_year                        ?
_journal_volume                      ?
_journal_issue                       ?
_journal_page_first                  ?
_journal_page_last                   ?
_journal_paper_category              ?
_journal_suppl_publ_number           ?
_journal_suppl_publ_pages            ?
 
#=============================================================================
 
# 1. SUBMISSION DETAILS
 
_publ_contact_author_name            
?  # Name of author for correspondence
_publ_contact_author_address            # Address of author for correspondence

?

_publ_contact_author_email           ?
_publ_contact_author_fax             ?
_publ_contact_author_phone           ?
 
_publ_contact_letter
;
Please consider this CIF for publication. I certify that this contibution is the
original work of those listed as authors; that it has not been published
before (in any language or medium) and is not being considered for publication
elsewhere; that all authors concur with and are aware of the submission; that
all workers involved in the study are listed as authors or given proper credit
in the acknowledgements; that I have obtained permission for and acknowledged
the source of any excerpts from other copyright works; and that to the best of
my knowledge the paper contains no statements which are libellous, unlawful or
in any way actionable. All coauthors have made significant scientific
contributions to the work reported, including the ideas and their execution,
and share responsibility and accountability for the results.
;

 
_publ_requested_journal              ?
_publ_requested_coeditor_name        ?
_publ_requested_category             ?   # Acta C: one of CI/CM/CO/FI/FM/FO
 
 
# Definition of non standard CIF items (Reliability indices used in FULLPROF) 
 
loop_ 
_publ_manuscript_incl_extra_item
_publ_manuscript_incl_extra_info
_publ_manuscript_incl_extra_defn
#      Name                               Explanation                 Standard?
#     ------                              -----------                 ---------
 '_pd_proc_ls_prof_cR_factor'    'Prof. R-factor CORRECTED for background'   no
 '_pd_proc_ls_prof_cwR_factor'   'wProf.R-factor CORRECTED for background'   no
 '_pd_proc_ls_prof_cwR_expected' 'wProf.Expected CORRECTED for background'   no
 '_pd_proc_ls_prof_chi2'         'Chi-square for all considered points'      no
 '_pd_proc_ls_prof_echi2'        'Chi-2 for points with Bragg contribution'  no
#=============================================================================
 
# 3. TITLE AND AUTHOR LIST
 
_publ_section_title
;
Ordered Structure and Uniaxial Thermal Expansion in Tungsten Bronze
Pb2K0.5Li0.5Nb5O15
;
_publ_section_title_footnote
.
 
# The loop structure below should contain the names and addresses of all 
# authors, in the required order of publication. Repeat as necessary.
 
loop_
_publ_author_name
_publ_author_address
_publ_author_footnote
_publ_author_email
?
?
?
.


 
#=============================================================================
 
# 4. TEXT
 
_publ_section_synopsis
.
_publ_section_abstract
;
(type here to add abstract)
;
          
_publ_section_comment
;
(type here to add)
;

_publ_section_exptl_prep      # Details of the preparation of the sample(s)
                              # should be given here. 
;
(type here to add preparation details)
;

_publ_section_exptl_refinement
;
(type here to add refinement details)
;

_publ_section_references
;
?
;


_publ_section_figure_captions
;

;

_publ_section_acknowledgements
;
?
;


 
#=============================================================================
 
#=============================================================================
# If more than one structure is reported, the remaining sections should be 
# completed per structure. For each data set, replace the '?' in the
# data_? line below by a unique identifier.
 
data_PbK0.5L0.5Nb5O15              
_refine_ls_goodness_of_fit_all   1.96


_exptl_crystal_density_diffrn   6.28
#Added by publCIF


_refine_ls_extinction_coef   ?
#Added by publCIF


_refine_ls_weighting_scheme   ?
#Added by publCIF


_refine_ls_structure_factor_coef   ?
#Added by publCIF


 
#=============================================================================
 
# 5. CHEMICAL DATA
 
_chemical_name_systematic
;

;

_chemical_name_common             Pb2K0.5Nb5O15
_chemical_formula_moiety          ?
_chemical_formula_structural      tetragonal
_chemical_formula_analytical      ?
_chemical_formula_iupac           'Pb2 K0.5 Li0.5 Nb5 O15'
_chemical_formula_sum             K0.5Nb5O15Pb2
_chemical_formula_weight          1131
_chemical_melting_point           ?
_chemical_compound_source         ?       # for minerals and 
                                          # natural products
 
loop_
    _atom_type_symbol               
    _atom_type_scat_length_neutron      
    _atom_type_scat_source          
Nb     0.70540 V.F._Sears_Neutron_News_3_26_(1992)
Pb     0.94050 V.F._Sears_Neutron_News_3_26_(1992)
K      0.36700 V.F._Sears_Neutron_News_3_26_(1992)
Li    -0.19000 V.F._Sears_Neutron_News_3_26_(1992)
O      0.58030 V.F._Sears_Neutron_News_3_26_(1992)
 
#=============================================================================
 
# 6. POWDER SPECIMEN AND CRYSTAL DATA
 
_symmetry_cell_setting                orthorhombic
_symmetry_space_group_name_H-M       'B b 21 m'
_symmetry_space_group_name_Hall      'B -2 -2b'
 
loop_
    _symmetry_equiv_pos_as_xyz   #<--must include 'x,y,z'
'x,y,z'
'-x,y+1/2,z'
'-x,y+1/2,-z'
'x,y,-z'
'x+1/2,y,z+1/2'
'-x+1/2,y+1/2,z+1/2'
'-x+1/2,y+1/2,-z+1/2'
'x+1/2,y,-z+1/2'
 
_cell_length_a                       35.2811(3)
_cell_length_b                       17.96624(15)
_cell_length_c                       7.74968(6)
_cell_angle_alpha                    90.00000
_cell_angle_beta                     90.00000
_cell_angle_gamma                    90.00000
_cell_volume                         4912.28(7)
_cell_formula_units_Z                16
_cell_measurement_temperature        300
_cell_special_details
orthagonal
# The next three fields give the specimen dimensions in mm.  The equatorial
# plane contains the incident and diffracted beam.
 
_pd_spec_size_axial               ?       # perpendicular to 
                                          # equatorial plane
_pd_spec_size_equat               ?       # parallel to 
                                          # scattering vector
                                          # in transmission
_pd_spec_size_thick               ?       # parallel to 
                                          # scattering vector
                                          # in reflection
 
# The next five fields are character fields that describe the specimen.
 
_pd_spec_mounting                         # This field should be
                                          # used to give details of the 
                                          # container.
?
_pd_spec_mount_mode               
transmission       # options are 'reflection'
                                          # or 'transmission'
_pd_spec_shape                    irregular       # options are 'cylinder' 
                                          # 'flat_sheet' or 'irregular'
_pd_char_particle_morphology      ?
_pd_char_colour                   
white       # use ICDD colour descriptions
 
# The following three fields describe the preparation of the specimen.
# The cooling rate is in K/min.  The pressure at which the sample was 
# prepared is in kPa.  The temperature of preparation is in K.        
 
_pd_prep_cool_rate                ?
_pd_prep_pressure                101
_pd_prep_temperature              300
 
# The next four fields are normally only needed for transmission experiments.
 
_exptl_absorpt_coefficient_mu        ?
_exptl_absorpt_correction_type       ?
_exptl_absorpt_process_details       ?
_exptl_absorpt_correction_T_min      ?
_exptl_absorpt_correction_T_max      ?
 


#=============================================================================
 
# 7. EXPERIMENTAL DATA
 
_exptl_special_details
?
 
# The following item is used to identify the equipment used to record 
# the powder pattern when the diffractogram was measured at a laboratory 
# other than the authors' home institution, e.g. when neutron or synchrotron
# radiation is used.
 
_pd_instr_location
?
_pd_calibration_special_details           # description of the method used
                                          # to calibrate the instrument
?
 
_diffrn_ambient_temperature          300
_diffrn_source                   neutron
_diffrn_radiation_type           'Constant Wavelength Neutron Diffraction' 
_diffrn_radiation_wavelength           1.54030
_diffrn_source_type               
'Synchrotron XRD'  # Put here the diffractometer

 
_diffrn_radiation_monochromator      ?
_diffrn_measurement_device_type      
'BT-1 diffractometer at NIST;beamline 11-ID-C at APS'
_diffrn_measurement_method           ?
_diffrn_detector_area_resol_mean     ?   # Not in version 2.0.1
_diffrn_detector                     ?
_diffrn_detector_type                ?   # make or model of detector
_pd_meas_scan_method                 step   # options are 'step', 'cont',
                                         # 'tof', 'fixed' or
                                         # 'disp' (= dispersive)
_pd_meas_special_details
?
 
#  The following four items give details of the measured (not processed)
#  powder pattern.  Angles are in degrees.
 
_pd_meas_number_of_points         3296
_pd_meas_2theta_range_min         3.00000
_pd_meas_2theta_range_max         167.75000
_pd_meas_2theta_range_inc         0.050000
 
#=============================================================================
 
# 8. REFINEMENT DATA
 
_refine_special_details
?
 
# Use the next field to give any special details about the fitting of the
# powder pattern.
 
_pd_proc_ls_special_details
?
 
# The next three items are given as text.
 
_pd_proc_ls_profile_function      ?
_pd_proc_ls_background_function   ?
_pd_proc_ls_pref_orient_corr
?
 
#  The following profile R-factors are NOT CORRECTED for background
#  The sum is extended to all non-excluded points.
#  These are the current CIF standard
 
_pd_proc_ls_prof_R_factor                3.9367
_pd_proc_ls_prof_wR_factor               5.1018
_pd_proc_ls_prof_wR_expected             3.6433

 
#  The following profile R-factors are CORRECTED for background
#  The sum is extended to all non-excluded points.
#  These items are not in the current CIF standard, but are defined above
 

#  The following items are not in the CIF standard, but are defined above

 
#  Items related to LS refinement
 
_refine_ls_R_I_factor                 4.2529
_refine_ls_number_reflns                  3087
_refine_ls_number_parameters               163
_refine_ls_number_restraints                 0
 
# The following four items apply to angular dispersive measurements.
# 2theta minimum, maximum and increment (in degrees) are for the 
# intensities used in the refinement.
 
_pd_proc_2theta_range_min                3.0232
_pd_proc_2theta_range_max              167.7732
_pd_proc_2theta_range_inc              0.050000
_pd_proc_wavelength                    1.540300
 
_pd_block_diffractogram_id        ?  # The id used for the block containing
                                     # the powder pattern profile (section 11)
 
# Give appropriate details in the next two text fields.
 
_pd_proc_info_excluded_regions    ?
_pd_proc_info_data_reduction      ?
 
# The following items are used to identify the programs used.
 
_computing_data_collection           ?
_computing_structure_solution        Fullprof
_computing_structure_refinement      FULLPROF
_computing_molecular_graphics        ?
_computing_publication_material      ?
 
#=============================================================================
 
# 9. ATOMIC COORDINATES AND DISPLACEMENT PARAMETERS
 
loop_
_atom_site_label
_atom_site_fract_x
_atom_site_fract_y
_atom_site_fract_z
_atom_site_U_iso_or_equiv
_atom_site_occupancy
_atom_site_adp_type
_atom_site_type_symbol

 Nb1 0.12556(6) 0.4600(17) 0.25000 0.00402(4) 1.00000 Uiso Nb
 Nb2 0.12523(6) -0.0404(18) 0.25000 0.00402(4) 1.00000 Uiso Nb
 Nb3 0.03751(4) 0.5701(17) 0.25000 0.00402(4) 1.00000 Uiso Nb
 Nb4 0.21577(5) 0.5670(18) 0.25000 0.00402(4) 1.00000 Uiso Nb
 Nb5 0.03300(5) 0.3512(17) 0.25000 0.00402(4) 1.00000 Uiso Nb
 Nb6 0.21726(5) 0.3549(17) 0.25000 0.00402(4) 1.00000 Uiso Nb
 Nb7 0.07074(5) 0.1399(17) 0.25000 0.00402(4) 1.00000 Uiso Nb
 Nb8 0.17703(4) 0.1431(18) 0.25000 0.00402(4) 1.00000 Uiso Nb
 Nb9 0.07144(4) 0.7768(18) 0.25000 0.00402(4) 1.00000 Uiso Nb
 Nb10 0.17974(5) 0.7864(17) 0.25000 0.00402(4) 1.00000 Uiso Nb
 Pb(p1) 0.03805(5) -0.0175(17) 0.00000 0.01391(11) 0.74441(17) Uiso Pb
 Pb(p2) 0.03532(4) -0.0240(17) 0.50000 0.01391(11) 0.74441(17) Uiso Pb
 Pb(p3) 0.20805(4) -0.0182(17) 0.00000 0.01391(11) 0.74441(17) Uiso Pb
 Pb(p4) 0.21063(5) -0.0015(17) 0.50000 0.01391(11) 0.74441(17) Uiso Pb
 Pb(p5) 0.12858(6) 0.6478(17) 0.00000 0.01391(11) 0.74441(17) Uiso Pb
 Pb(p6) 0.13433(4) 0.6577(18) 0.50000 0.01391(11) 0.74441(17) Uiso Pb
 Pb(p7) 0.13191(5) 0.2992(17) 0.50000 0.01391(11) 0.74441(17) Uiso Pb
 Pb(p8) 0.11616(4) 0.3067(17) 0.00000 0.01391(11) 0.74441(17) Uiso Pb
 Pb(s1) 0.00101(8) 0.2139(18) 0.00000 0.01391(11) 0.51118(17) Uiso Pb
 Pb(s2) 0.24672(7) 0.2061(17) 0.00000 0.01391(11) 0.51118(17) Uiso Pb
 Pb(s3) 0.00259(8) 0.2084(18) 0.50000 0.01391(11) 0.51118(17) Uiso Pb
 Pb(s4) 0.25036(8) 0.2099(17) 0.50000 0.01391(11) 0.51118(17) Uiso Pb
 K(p1) 0.03805(5) -0.0175(17) 0.00000 0.01391(11) 0.25000 Uiso K
 K(p2) 0.03532(4) -0.0240(17) 0.50000 0.01391(11) 0.25000 Uiso K
 K(p3) 0.20805(4) -0.0182(17) 0.00000 0.01391(11) 0.25000 Uiso K
 K(p4) 0.21063(5) -0.0015(17) 0.50000 0.01391(11) 0.25000 Uiso K
 K(p5) 0.12858(6) 0.6478(17) 0.00000 0.01391(11) 0.25000 Uiso K
 K(p6) 0.13433(4) 0.6577(18) 0.50000 0.01391(11) 0.25000 Uiso K
 K(p7) 0.13191(5) 0.2992(17) 0.50000 0.01391(11) 0.25000 Uiso K
 K(p8) 0.11616(4) 0.3067(17) 0.00000 0.01391(11) 0.25000 Uiso K
 K(s1) 0.00101(8) 0.2139(18) 0.00000 0.01391(11) 0.00000 Uiso K
 K(s2) 0.24672(7) 0.2061(17) 0.00000 0.01391(11) 0.00000 Uiso K
 K(s3) 0.00259(8) 0.2084(18) 0.50000 0.01391(11) 0.00000 Uiso K
 K(s4) 0.25036(8) 0.2099(17) 0.50000 0.01391(11) 0.00000 Uiso K
 O1 0.11504(14) 0.4381(18) 0.00000 0.00905(8) 1.00000 Uiso O
 O2 0.36458(14) -0.0600(18) 0.00000 0.00905(8) 1.00000 Uiso O
 O3 0.13761(13) -0.0486(18) 0.00000 0.00905(8) 1.00000 Uiso O
 O4 0.38773(13) 0.4485(18) 0.00000 0.00905(8) 1.00000 Uiso O
 O5 0.46083(19) 0.0685(17) 0.50000 0.00905(8) 1.00000 Uiso O
 O6 0.47365(17) 0.0529(18) 0.00000 0.00905(8) 1.00000 Uiso O
 O7 0.27077(15) 0.0560(18) 0.50000 0.00905(8) 1.00000 Uiso O
 O8 0.28772(17) 0.0613(18) 0.00000 0.00905(8) 1.00000 Uiso O
 O9 0.04202(17) 0.3196(17) 0.00000 0.00905(8) 1.00000 Uiso O
 O10 0.02372(19) 0.3552(18) 0.50000 0.00905(8) 1.00000 Uiso O
 O11 0.22609(18) 0.3369(18) 0.00000 0.00905(8) 1.00000 Uiso O
 O12 0.20607(17) 0.3357(18) 0.50000 0.00905(8) 1.00000 Uiso O
 O13 0.07110(16) 0.1608(18) 0.00000 0.00905(8) 1.00000 Uiso O
 O14 0.06768(17) 0.1162(18) 0.50000 0.00905(8) 1.00000 Uiso O
 O15 0.17336(17) 0.1338(18) 0.00000 0.00905(8) 1.00000 Uiso O
 O16 0.18840(16) 0.1243(18) 0.50000 0.00905(8) 1.00000 Uiso O
 O17 0.42471(18) 0.2581(18) 0.50000 0.00905(8) 1.00000 Uiso O
 O18 0.43279(19) 0.2713(18) 0.00000 0.00905(8) 1.00000 Uiso O
 O19 0.33086(16) 0.2749(17) 0.50000 0.00905(8) 1.00000 Uiso O
 O20 0.31576(15) 0.2501(18) 0.00000 0.00905(8) 1.00000 Uiso O
 O21 0.41379(14) 0.0296(18) 0.2374(6) 0.00905(8) 1.00000 Uiso O
 O22 0.33519(15) 0.0301(18) 0.2885(6) 0.00905(8) 1.00000 Uiso O
 O23 0.45048(12) 0.1625(18) 0.2301(6) 0.00905(8) 1.00000 Uiso O
 O24 0.30340(12) 0.1668(18) 0.2942(6) 0.00905(8) 1.00000 Uiso O
 O25 0.01655(10) 0.4509(17) 0.2356(5) 0.00905(8) 1.00000 Uiso O
 O26 0.23221(11) 0.4487(18) 0.2758(4) 0.00905(8) 1.00000 Uiso O
 O27 0.02047(12) 0.0898(18) 0.1968(5) 0.00905(8) 1.00000 Uiso O
 O28 0.23123(12) 0.0898(18) 0.2211(6) 0.00905(8) 1.00000 Uiso O
 O29 0.08532(13) 0.0269(18) 0.2097(7) 0.00905(8) 1.00000 Uiso O
 O30 0.16636(13) 0.0221(18) 0.2820(6) 0.00905(8) 1.00000 Uiso O
 O31 0.12479(17) 0.1650(18) 0.2746(6) 0.00905(8) 1.00000 Uiso O
 O32 0.37618(17) 0.2335(17) 0.2294(6) 0.00905(8) 1.00000 Uiso O
 O33 0.41413(12) 0.3764(18) 0.2813(6) 0.00905(8) 1.00000 Uiso O
 O34 0.33632(12) 0.3698(18) 0.2136(6) 0.00905(8) 1.00000 Uiso O
 O35 0.48241(11) 0.2962(17) 0.2752(6) 0.00905(8) 1.00000 Uiso O
 O36 0.26530(12) 0.3039(18) 0.2670(6) 0.00905(8) 1.00000 Uiso O
 O37 0.04852(11) 0.2328(18) 0.2863(6) 0.00905(8) 1.00000 Uiso O
 O38 0.19630(12) 0.2327(17) 0.2277(5) 0.00905(8) 1.00000 Uiso O
 O39 0.08885(13) 0.3661(18) 0.2840(7) 0.00905(8) 1.00000 Uiso O
 O40 0.16193(14) 0.3719(18) 0.2137(6) 0.00905(8) 1.00000 Uiso O

 
# Note: if the displacement parameters were refined anisotropically
# the U matrices should be given as for single-crystal studies.
 
#=============================================================================
 
# 10. DISTANCES AND ANGLES / MOLECULAR GEOMETRY 
 
_geom_special_details                ?
 
loop_
    _geom_bond_atom_site_label_1  
    _geom_bond_atom_site_label_2  
    _geom_bond_site_symmetry_1    
    _geom_bond_site_symmetry_2    
    _geom_bond_distance           
    _geom_bond_publ_flag          
    Nb7   O13   ?   ?   1.974   ?
 
loop_
    _geom_contact_atom_site_label_1 
    _geom_contact_atom_site_label_2 
    _geom_contact_distance          
    _geom_contact_site_symmetry_1   
    _geom_contact_site_symmetry_2   
    _geom_contact_publ_flag         
    ?   ?   ?   ?   ?   ?
 
loop_
_geom_angle_atom_site_label_1 
_geom_angle_atom_site_label_2 
_geom_angle_atom_site_label_3 
_geom_angle_site_symmetry_1   
_geom_angle_site_symmetry_2   
_geom_angle_site_symmetry_3   
_geom_angle                   
_geom_angle_publ_flag         
O14   Nb7   O13 ?   ?   ? 177  ?  
 
loop_
_geom_torsion_atom_site_label_1 
_geom_torsion_atom_site_label_2 
_geom_torsion_atom_site_label_3 
_geom_torsion_atom_site_label_4 
_geom_torsion_site_symmetry_1   
_geom_torsion_site_symmetry_2   
_geom_torsion_site_symmetry_3   
_geom_torsion_site_symmetry_4   
_geom_torsion                   
_geom_torsion_publ_flag         
?   ?   ?   ?   ?   ?   ?   ?   ?   ?
 
loop_
_geom_hbond_atom_site_label_D 
_geom_hbond_atom_site_label_H 
_geom_hbond_atom_site_label_A 
_geom_hbond_site_symmetry_D   
_geom_hbond_site_symmetry_H   
_geom_hbond_site_symmetry_A   
_geom_hbond_distance_DH       
_geom_hbond_distance_HA       
_geom_hbond_distance_DA       
_geom_hbond_angle_DHA         
_geom_hbond_publ_flag         
?   ?   ?   ?   ?   ?   ?   ?   ?   ?   ?
 
#=============================================================================
 
#=============================================================================
# Additional structures (last six sections and associated data_? identifiers) 
# may be added at this point.                                                 
#=============================================================================
 
# The following lines are used to test the character set of files sent by     
# network email or other means. They are not part of the CIF data set.        
# abcdefghijklmnopqrstuvwxyzABCDEFGHIJKLMNOPQRSTUVWXYZ0123456789              
# !@#$%^&*()_+{}:"~<>?|\-=[];'`,./
